# Supplementary material
Source: Research Square preprint supplement (doi:10.21203/rs.3.rs-9781631/v1)
Supplement: Supplementary file 1 [file bb6721591aba5accdec0d4cf.docx]

Appendix 1. Reference list to the examined city climate strategies

Abu Dhabi Government. (2025). Abu Dhabi Climate Change Strategy. Available at: https://www.abudhabi.gov.ae/en/programmes/abu-dhabi-climate-change-strategy [Accessed 17 Feb 2026].

Accra Metropolitan Assembly. (2015). Accra Resilience Strategy. Available at: https://www.preventionweb.net/publication/accra-resilience-strategy [Accessed 17 Feb 2026].

ShiftCities. (2023). Accra Greening and Beautification Project. C40 Cities. Available at: https://www.shiftcities.org/sites/default/files/2023-09/POSTER-C40EDIT%201.pdf [Accessed 17 Feb 2026].

City of Amsterdam. (2022). Roadmap Amsterdam Climate Neutral 2050. Available at: https://www.amsterdam.nl/en/policy/sustainability/policy-climate-neutrality/ [Accessed 17 Feb 2026].

Asian Development Bank (ADB). (2021). Climate Change Assessment: Chongqing Gaoxin District Green and Low-Carbon Urban Development Program. Available at: https://www.adb.org/sites/default/files/linked-documents/56182-001-cca.pdf [Accessed 17 Feb 2026].

Asian Development Bank (ADB). (2021). Supplementary Document to Chongqing Gaoxin District Green and Low-Carbon Urban Development Program. Available at: https://www.adb.org/sites/default/files/linked-documents/56182-001-ssa.pdf [Accessed 17 Feb 2026].

Asian Development Bank (ADB). (2020). Xiangtan Low-Carbon Transformation Sector Development Program: Initial Poverty and Social Analysis. Available at: https://www.adb.org/sites/default/files/project-documents/52230/52230-001-ipsa-en.pdf [Accessed 17 Feb 2026].

City of Athens. (2022). Climate Action Plan. Available at: https://www.cityofathens.gr/wp-content/uploads/2022/08/schedio-gia-tin-klimatiki-allagi-9-6-2022.pdf [Accessed 17 Feb 2026].

Balikpapan City. (2016). RAD Adaptasi Balikpapan (Climate Change Action Plan). Available at: https://www.scribd.com/document/469220917/RAD-ADAPTASI-BALIKPAPAN-Final [Original link no longer available as of 17 Feb 2026, accessed via copy].

Barcelona City Council. (2024). Pla Clima Barcelona. Available at: https://www.barcelona.cat/barcelona-pel-clima/en/el-pla-clima [Accessed 17 Feb 2026].

Batumi City. (2019). Batumi Green City Action Plan. Available at: https://batumi.ge/ge/upload/Batumi%20GCAP_V5.2.pdf [Accessed 17 Feb 2026].

Belfer Center for Science and International Affairs. (2014). Pursuing a Low-Carbon Action Plan: The Case of Chongqing City. Harvard Kennedy School. Available at: https://www.belfercenter.org/publication/pursuing-low-carbon-action-plan-case-chongqing-city [Accessed 17 Feb 2026].

Berlin Senate Department for Environment, Urban Development and Climate Protection. (2020). Climate-Neutral Berlin 2050. Available at: https://www.berlin.de/sen/uvk/_assets/klimaschutz/publikationen/broschuere_bek_en.pdf [Accessed 17 Feb 2026].

Bogor City. (2017). Bogor Green City Action Plan. ICLEI Southeast Asia. Available at: https://icleiseas.org/wp-content/uploads/2017/03/ICLEI-Case-Study_195_Bogor.pdf [Accessed 17 Feb 2026].

Municipality of Bologna. (2024). Contratto Climatico. Available at: https://www.comune.bologna.it/ [Accessed 17 Feb 2026].

Bordeaux Métropole. (2022). Plan Climat Air Énergie Territorial. Available at: https://www.bordeaux-metropole.fr/metropole/feuilles-route/plan-climat-air-energie-territorial [Accessed 17 Feb 2026].

City of Brussels. (2022). Plan Climat du territoire de la Ville de Bruxelles. Available at: https://www.bruxelles.be/sites/default/files/bxl/221130%20%20Plan%20Climat%20Version%20finale_FR.pdf [Accessed 17 Feb 2026].

Net Zero Cities. (2023). Climate Neutrality Action Plan for Budapest. Available at: https://netzerocities.app/_content/files/knowledge/4650/ccc_budapest.pdf [Accessed 17 Feb 2026].

Municipality of Budapest. (2020). Sustainable Energy and Climate Action Plan (SECAP). Available at: https://archiv.budapest.hu/sites/english/Documents/BP_klimastrategia_SECAP_EN_final.pdf [Accessed 17 Feb 2026].

Buenos Aires Prefecture. (2023). Climate Action Plan 2050. Available at: https://buenosaires.gob.ar/gcaba_historico/sites/default/files/2023-02/pac_2050_buenos_aires_eng_0.pdf [Accessed 17 Feb 2026].

100 Resilient Cities. (2016). Resilient Buenos Aires. Available at: https://resilientcitiesnetwork.org/downloadable_resources/Network/Buenos-Aires-Resilience-Strategy-English.pdf [Accessed 17 Feb 2026].

C40 Cities Climate Leadership Group. (n.d.). How Heidelberg Built One of the World's Largest Carbon Neutral Districts. Available at: https://www.c40knowledgehub.org/s/article/How-Heidelberg-built-one-of-the-worlds-largest-carbon-neutral-districts [Accessed 17 Feb 2026].

Chengdu City. (2022). Park City Initiative. Available at: https://www.gochengdu.cn/en/article/features/703 [Accessed 17 Feb 2026].

Chennai Corporation. (2022). Chennai Climate Action Plan (CCAP). Available at: https://chennaicorporation.gov.in/gcc/CCAP/ [Accessed 17 Feb 2026].

Chicago City. (2022). Climate Action Plan. Available at: https://www.chicago.gov/city/en/sites/climate-action-plan/home.html [Accessed 17 Feb 2026].

City GAP Fund. (2025). Greening Roofs and Urban Spaces in Podgorica, Montenegro. Available at: https://www.citygapfund.org/wp-content/uploads/2025/12/Podgorica-factsheet.pdf [Accessed 17 Feb 2026].

Climate Chance. (2026). Cocody Green City - Carbon Sink. Available at: https://www.climate-chance.org/en/best-pratices/cocody-green-city-carbon-sink/ [Accessed 17 Feb 2026].

Climate Change Department, Tonga. (2026). About Us: Climate Change Coordination. Available at: https://climatechange.gov.to/about-us/ [Accessed 17 Feb 2026].

Climate-KIC. (2022). A New Air and Climate Plan for Milan. Available at: https://www.climate-kic.org/news/a-new-air-and-climate-plan-for-milan/ [Accessed 17 Feb 2026].

Climate-KIC. (2021). Krakow: Transforming the City Towards Climate Neutrality. Available at: https://www.climate-kic.org/news/krakow-transforming-the-city-towards-climate-neutrality/ [Accessed 17 Feb 2026].

Net Zero Cities. (2023). Cluj-Napoca 2030 Climate Neutrality Action Plan. Available at: https://netzerocities.app/_content/files/knowledge/4061/cluj_napoca_nzc_ccc_ok_.pdf [Accessed 17 Feb 2026].

Copenhagen Municipality. (2020). CPH 2025 Climate Plan. Available at: https://urbandevelopmentcph.kk.dk/climate [Accessed 17 Feb 2026].

Cork City Council. (2023). Cork City Climate Action Plan. Available at: https://www.corkcity.ie/en/climate-action/cork-city-climate-action-plan/ [Accessed 17 Feb 2026].

Ministry of Environment and Energy – Department of Climate Change. (2018). Plan Nacional de Descarbonización 2018-2050. Available at: https://cambioclimatico.minae.go.cr/plan-nacional-de-descarbonizacion/ [Accessed 17 Feb 2026].

City of Curitiba. (2020). Plano Clima. Available at: https://mid.curitiba.pr.gov.br/2020/00306556.pdf [Accessed 17 Feb 2026].

City of Curitiba. (2013). Plano de Arborização. Available at: https://www.curitiba.pr.gov.br/noticias/plano-de-arborizacao-colocou-139-mil-arvores-em-curitiba-desde-2013/40342 [Accessed 17 Feb 2026].

International Association of French Speaking Mayors. (2022). Plan Climat Energie Territorial. AIMF. Available at: https://plans-climat.aimf.asso.fr/wp-content/uploads/2024/05/SEN_Dakar.pdf [Accessed 17 Feb 2026].

Dar es Salaam City Council. (2020). Climate Action Plan. Available at: https://dcc.go.tz/storage/app/uploads/public/698/09b/e33/69809be33f37a892164664.pdf [Accessed 17 Feb 2026].

Deifferdange City. (2026). Net Zero Deifferdeng 2030. Available at: https://netzero2030.lu/en/ [Accessed 17 Feb 2026].

City of Detroit. (2023). Detroit Climate Strategy. Available at: https://detroitmi.gov/government/mayors-office/office-sustainability/detroit-climate-strategy-hub [Accessed 17 Feb 2026].

Dijon Métropole. (2025). Plan Climat et Biodiversité 2024-2030. Available at: https://www.dijon-metropole.fr/wp-content/uploads/sites/25/2025/03/2-Le-Plan-Climat-et-Biodiversite-2024-2030.pdf [Accessed 17 Feb 2026].

Durban City (eThekwini Municipality). (n.d.). Durban Climate Change Strategy (DCCS). Available at: https://durban.gov.za/storage/Documents/Climate/DCCS_Strategy.pdf [Original link no longer available as of 17 February 2026, pdf was downloaded for the assessment analysis].

EBRD Green Cities. (2022). Green City Action Plan Dushanbe City. Available at: https://ebrdgreencities.com/assets/Uploads/PDF/Dushanbe_GCAP_2022_ENG.pdf?vid=3 [Accessed 17 Feb 2026].

EBRD Green Cities. (2019). Ulaanbaatar Green City Action Plan (GCAP). Available at: https://www.scribd.com/document/581539656/Ulaanbaatar-GCAP-Eng [Original link no longer available as of 17 Feb 2026, accessed via copy].

City of Edinburgh. (2021). 2030 Climate Strategy. Available at: https://www.edinburgh.gov.uk/downloads/download/15068/2030-climate-strategy [Accessed 17 Feb 2026].

UNDP Albania. (2026). Elbasan Adaptation Plan to Climate Changes. Available at: https://www.undp.org/sites/g/files/zskgke326/files/2026-02/3.1.1.2_leaflet_lap_elbasan.pdf [Accessed 17 Feb 2026].

Net Zero Cities. (2026). Elbasan Pilot Activity: Green and Sustainable Energy in Elbasan Buildings (GreenElb). Available at: https://netzerocities.eu/elbasan-pilot-activity-greenelb/ [Accessed 17 Feb 2026].

Freetown City Council. (2023). Climate Action Strategy. Available at: https://fcc.gov.sl/wp-content/uploads/2023/01/CAP-Freetown-FINAL.pdf [Accessed 17 Feb 2026].

Green Climate Fund. (2024). Tonga Coastal Resilience Project Launched in Nuku'alofa. Available at: https://www.greenclimate.fund/news/tonga-coastal-resilience-project-launched-nuku-alofa [Accessed 17 Feb 2026].

Guimarães Municipality. (2024). Plano Municipal de Ação Climática. Available at: https://www.cm-guimaraes.pt/areas-de-intervencao/ambiente-e-sustentabilidade/ambiente/ambiente-e-sustentabilidade/acao-climatica/plano-municipal-de-acao-climatica [Accessed 17 Feb 2026].

Heidelberg City. (2025). Urban Development Concept 2035 (Stadtentwicklungskonzept 2035). Available at: https://www.heidelberg.de/HD/Rathaus/stadtentwicklungskonzept+2035.html [Accessed 17 Feb 2026].

Heidelberg City. (2023). Stadtentwicklungskonzept 2035: Statusbericht. Available at: https://www.heidelberg.de/site/Heidelberg2021/get/documents_E2109515062/heidelberg/Objektdatenbank/12/PDF/230703_A4_Statusbericht_STEK_web.pdf [Accessed 17 Feb 2026].

Heidelberg City. (2023). 2030 Climate Neutrality Action Plan. NetZeroCities. Available at: https://netzerocities.app/_content/files/knowledge/4182/heidelberg_nzc_ccc_ok.pdf [Accessed 17 Feb 2026].

Heidelberg City. (2026). Master Plan 100% Climate Protection. Available at: https://www.heidelberg.de/english/Home/climate+protection/masterplan+100_+climate+protection.html [Accessed 17 Feb 2026].

ICLEI South Asia. (2023). Capacity Building for Low Carbon and Climate Resilient City Development (CapaCITIES II). Available at: https://southasia.iclei.org/wp-content/uploads/2023/02/CapaCITIES-II-28-Brochure_low-res.pdf [Accessed 17 Feb 2026].

ICLEI South Asia. (2020). Surat Climate Action Plan Project. Available at: https://southasia.iclei.org/project/surat-climate-action-plan/ [Accessed 17 Feb 2026].

ICLEI South Asia. (2022). Climate Resilient Cities Action Plan (CRCAP): Rajkot. Available at: https://southasia.iclei.org/wp-content/uploads/2022/04/Rajkot_CRCAP.pdf [Accessed 17 Feb 2026].

ICLEI South America. (2020). Plano Local de Ação Climática do Recife. Available at: https://americadosul.iclei.org/wp-content/uploads/sites/19/2020/12/20-recife-acaoclimat-1.pdf [Accessed 17 Feb 2026].

ICLEI South America. (2020). Plano de Mitigação e Adaptação às Mudanças do Clima de Salvador. Available at: https://americadosul.iclei.org/documentos/plano-de-mitigacao-e-adaptacao-as-mudancas-do-clima-de-salvador/ [Accessed 17 Feb 2026].

IGES (Institute for Global Environmental Strategies). (2025). Makassar City Low Carbon Development. Available at: https://www.iges.or.jp/sites/default/files/2025-01/PD02-01_Makassar%20City.pdf [Accessed 17 Feb 2026].

IIED, ICLEI & The Rockefeller Foundation. (2013). Building Resilience in Asian Cities. Available at: https://www.iied.org/sites/default/files/pdfs/migrate/10816IIED.pdf [Accessed 17 Feb 2026].

IIED (International Institute for Environment and Development). (2024). San José: Ecoins – Promoting the Circular Economy and Decarbonisation Through Public-Private Partnerships. Available at: https://www.iied.org/san-jose-ecoins-promoting-circular-economy-decarbonisation-through-public-private-partnerships [Accessed 17 Feb 2026].

Institute for Transportation and Development Policy (ITDP). (2022). Tartu's Approach to Climate Goals Through Sustainable Mobility Planning. Available at: https://itdp.org/wp-content/uploads/2022/04/MOBILIZE-TARTU-Case-Study.pdf [Accessed 17 Feb 2026].

Interlace Hub. (2020). Climate Action Plan of Quito. Available at: https://interlace-hub.com/climate-action-plan-quito [Accessed 17 Feb 2026].

ISOCARP (International Society of City and Regional Planners). (2018). Urban and Regional Planning for Wuhan. Available at: https://isocarp.org/app/uploads/2018/06/PLAN-Wuhan-_12-Jun.pdf [Accessed 17 Feb 2026].

Istanbul Metropolitan Municipality. (2022). Istanbul Climate Change Action Plan. Available at: https://cevre.ibb.istanbul/wp-content/uploads/2022/06/istanbul_climate_change_action_plan_v03.pdf [Accessed 17 Feb 2026].

City of Johannesburg. (2020). City of Johannesburg Climate Action Plan. Available at: https://www.gpma.co.za/wp-content/uploads/2023/02/2020_12_01-City-of-Johannesburg-CAP.pdf [Accessed 17 Feb 2026].

Kampala Capital City Authority. (2016). Climate Change Action Strategy. Available at: https://www.kcca.go.ug/climate-change [Accessed 17 Feb 2026].

World Bank (2021). Rwanda Second Urban Development Project. Available at: https://projects.worldbank.org/en/projects-operations/project-detail/P165017 [Accessed 17 Feb 2026].

Net Zero Cities. (2023). Krakow Climate City Contract. Available at: https://netzerocities.app/_content/files/knowledge/4663/ccc_krakow.pdf [Accessed 17 Feb 2026].

Net Zero Cities. (2023). Kranj 2030 Climate Neutrality Action Plan. Available at: https://netzerocities.app/_content/files/knowledge/4443/2030_ccc_city_of_kranj.pdf [Accessed 17 Feb 2026].

Lagos State. (2021). Lagos Climate Action Plan. C40 Cities. Available at: https://moelagos.gov.ng/wp-content/uploads/2021/09/C40-Lagos_Indesign-Document-Full-Report-Revert-2_Update-2.pdf [Accessed 17 Feb 2026].

Urban Coalitions. (2021). Laboratorio Urbano de León: Transformative Urban Coalitions. Available at: https://urbancoalitions.org/pt-br/noticias-eventos/atualizacao-sobre-o-laboratorio-urbano-de-leon [Accessed 17 Feb 2026].

León City, Mexico. (2021). Transformative Urban Coalitions: León City Profile. Available at: https://www.researchgate.net/publication/365534591_TRANSFORMATIVE_URBAN_COALITIONS_LEON_MEXICO_CITY_PROFILES_NO_2 [Original link no longer available. Accessed 17 Feb 2026].

Liberec City. (n.d.). CCC Action Plan. Available at: https://www.liberec.cz/files/dokumenty/odbory/odbor-strategickeho-rozvoje-dotaci/dotacni%20projekty/zw/ccc-action-plan_city-liberec.pdf [Original link no longer available as of 17 Feb 2026].

Liepāja City. (2024). Climate Neutrality Action Plan. Available at: https://faili.liepaja.lv/Publikacijas/42__22_02_2024__PIELIKUMS__ACTION_PLAN_LIEPAJA_203.pdf [Accessed 17 Feb 2026].

Limassol Municipality. (2023). 2030 Climate Neutrality Action Plan. NetZeroCities. Available at: https://www.limassol.org.cy/uploads/Missioncities/f2f7708516.pdf [Accessed 17 Feb 2026].

Lisbon City. (2021). PAC Lisboa 2030 (Plano de Ação Climática). Available at: https://amensagem.pt/wp-content/uploads/2021/08/PAC_LISBOA_2030_Relatorio.pdf [Accessed 17 Feb 2026].

Greater London Authority. (2022). Zero Carbon London: A 1.5°C Compatible Plan. Available at: https://www.london.gov.uk/sites/default/files/1.5_action_plan_amended.pdf [Accessed 17 Feb 2026].

City of Madrid. (2022). Roadmap to Climate Neutrality by 2050. Available at: https://airedemadrid.madrid.es/UnidadesDescentralizadas/Sostenibilidad/EspeInf/EnergiayCC/06Divulgaci%C3%B3n/6cDocumentacion/6cNHRNeutral/Ficheros/RoadmapENG2022.pdf [Accessed 17 Feb 2026].

UNCCLEARN. (2014). Makassar City Low Carbon City Development. Available at: https://www.uncclearn.org/wp-content/uploads/library/makassar_indonesia_-_climate_change_vulnerability_assessment.pdf [Accessed 17 Feb 2026].

Net Zero Cities. (2023). Malmö Climate Neutrality Action Plan. Available at: https://netzerocities.app/_content/files/knowledge/4189/malmo_nzc_ccc_ok.pdf [Accessed 17 Feb 2026].

Net Zero Cities. (2023). Marseille Climate City Contract. Available at: https://netzerocities.app/_content/files/knowledge/4976/marseille_ccc.pdf [Accessed 17 Feb 2026].

Melbourne City. (2017). Climate Change Adaptation Strategy. Available at: https://www.melbourne.vic.gov.au/climate-change-adaptation-strategy [Accessed 17 Feb 2026].

Mexico City (CDMX). (2018). Plan de Acción Climática de la Ciudad de México. Available at: http://www.data.sedema.cdmx.gob.mx/cambioclimaticocdmx/images/biblioteca_cc/Plan-de-Accion-Climatica-de-la-CDMX.pdf [Accessed 17 Feb 2026].

City of Milan. (2022). Piano Aria e Clima. Available at: https://www.comune.milano.it/argomenti/ambiente-e-animali/piano-aria-e-clima [Accessed 17 Feb 2026].

C40 Cities. (2022). Mumbai Climate Action Plan. Available at: https://www.c40.org/news/mumbai-climate-action-plan/ [Accessed 17 Feb 2026].

Munich City. (2021). Maßnahmenplan Klimaneutralität München (Action Plan for Climate Neutrality Munich). Available at: https://stadt.muenchen.de/dam/jcr:dc76020e-b14b-42ca-9eea-4c3ce538b951/Massnahmenplan-Klimaneutralitaet-Muenchen.pdf [Accessed 17 Feb 2026].

Nairobi City County. (2020). Nairobi City County Climate Action Plan 2020-2050. Available at: https://nairobi.go.ke/download/nairobi-city-county-climate-action-plan-2020-2050/ [Accessed 17 Feb 2026].

Nashik Municipal Corporation. (2024). Nashik Climate Action Plan. Available at: https://nashikclimateactionplan.nmc.gov.in/ [Accessed 17 Feb 2026].

Urban Coalitions. (2014). Estrategias Experimentales de Adaptación: Dinámicas de Movilidad em Naucalpan. Available at: https://urbancoalitions.org/pt-br/noticias-eventos/estrategias-experimentais-de-adaptacao-em-naucalpan-dinamicas-de-mobilidade-e [Accessed 17 Feb 2026].

NEASPEC (North-East Asian Subregional Programme for Environmental Cooperation). (n.d.). Wuhan Carbon Peaking Action Plan 2017-2022. Available at: https://www.neaspec.org/sites/default/files/Wuhan%20Carbon%20Peaking%20Action%20Plan_2017-2022.pdf [Accessed 17 Feb 2026].

New York City. (2026). PlaNYC: Getting Sustainability Done. Available at: https://climate.cityofnewyork.us/initiatives/planyc-getting-sustainability-done/ [Accessed 17 Feb 2026].

City of Oslo. (2020). Climate Strategy for Oslo: Towards 2030. Available at: https://www.klimaoslo.no/rapport/climate-strategy-for-oslo-towards-2030/ [Accessed 17 Feb 2026].

City of Paris. (2019). Paris Climate Action Plan. Available at: https://cdn.paris.fr/paris/2019/07/24/1a706797eac9982aec6b767c56449240.pdf [Accessed 17 Feb 2026].

Podgorica City. (2015). Vulnerability Assessment and Adaptation Action Plan. Available at: https://starisajt.podgorica.me/db_files/Urbanizam/Dokumenta/pg_urban_cca_final_engl_05082015-edited.pdf [Accessed 17 Feb 2026].

Poznań City. (2019). Climate Change Adaptation Strategy for the City of Poznań. Available at: https://adaptcity.pl/wp-content/uploads/2019/11/strategia_2030-ENG.pdf [Accessed 17 Feb 2026].

Pune Municipal Corporation. (n.d.). Climate Action Plan. Available at: https://www.pmc.gov.in/en/gcom-climate-action-plan [Original link no longer available as of 17 Feb 2026, accessed via copy].

Urban Nature Atlas. (2026). Water Management Green Roof Initiative in Quezon. UNA (Urban Nature Atlas). Available at: https://una.city/nbs/quezon-city/water-management-green-roof [Accessed 17 Feb 2026].

ShiftCities. (2023). Low Emissions Last Mile Logistics in Quito. Available at: https://www.shiftcities.org/sites/default/files/2023-09/POSTER-LATINAMERICA%20copy%209.pdf [Accessed 17 Feb 2026].

ICLEI South Asia/Urban-LEDS II. (2022). Rajshahi Climate Resilient City Action Plan (CRCAP). Available at: https://urban-leds.org/wp-content/uploads/2022/02/Summary-Climate-Resilient-Cities-Action-Plan_Rajshahi.pdf [Accessed 17 Feb 2026].

Royal Commission for Riyadh City. (2025). Riyadh Sustainability Strategy. Available at: https://www.rcrc.gov.sa/en/projects/riyadh-sustainability-strategy/ [Accessed 17 Feb 2026].

City of Rome. (2026). Climate Plan (Roma per il Clima). Available at: https://www.romaperilclima.it/en/ [Accessed 17 Feb 2026].

Gemeente Rotterdam. (2012). Climate Change Adaptation Strategy. Available at: https://static1.squarespace.com/static/5f082078d610926644d22e00/t/62b19d595f452d43febaa862/1655807334154/20121210+RAS+EN+lr+versie+4_compressed.pdf [Accessed 17 Feb 2026].

City and County of San Francisco. (2021). Climate Action Plan. Available at: https://www.sfenvironment.org/files/events/2021_climate_action_plan.pdf [Accessed 17 Feb 2026].

TEVU - Transición hacia una Economía Verde Urbana. (2026). Available at: https://tevucr.org/ [Accessed 17 Feb 2026].

San Sebastián (Donostia) City. (2018). Plan de Acción Klima 2050. Available at: https://www.donostia.eus/ataria/documents/8023875/8246263/Sintesis+ekintza+plana+cas/a9c68586-1c6a-422f-821b-35564a16f83b [Accessed 17 Feb 2026].

Santiago de Chile. (2020). Plan de Acción para el Clima y la Energía Sostenible. Pacto de Alcaldes. Available at: https://pactodealcaldes-la.org/wp-content/uploads/2017/10/SECAP-SANTIAGO-2020.pdf [Accessed 17 Feb 2026].

São Paulo City. (2021). PlanClimaSP (Plano de Ação Climática). Available at: https://drive.prefeitura.sp.gov.br/cidade/secretarias/upload/governo/secretaria_executiva_de_mudancas_climaticas/arquivos/planclimasp/Sao%20Paulo_PlanClima_Executive%20Summary_ENG_INTERNAL%20DRAFT_20210407%20(2).pdf [Accessed 17 Feb 2026].

Saudi Green Initiative (SGI). (2024). SGI Target: Reduce Carbon Emissions by 278 MtPA by 2030. Available at: https://www.sgi.gov.sa/about-sgi/sgi-targets/reduce-carbon-emissions/ [Accessed 17 Feb 2026].

SEMPLAN (Secretaria Municipal de Planejamento, Teresina). (n.d.). CLIMATHE Program. Available at: https://semplan.pmt.pi.gov.br/climathe/ [Original link no longer available as of 17 Feb 2026, accessed via copy].

Seoul Metropolitan Government. (2026). Five-Year Plan for Climate Action. Available at: https://english.seoul.go.kr/seoul-announced-five-year-plan-to-tackle-climate-issues/ [Accessed 17 Feb 2026].

ShiftCities. (2025). How Teresina is Accelerating its Transition to a Green and Resilient City. Available at: https://www.shiftcities.org/post/how-teresina-accelerating-its-transition-green-and-resilient-city [Accessed 17 Feb 2026].

Singapore Government. (2021). Singapore Green Plan 2030. Available at: https://www.greenplan.gov.sg/ [Accessed 17 Feb 2026].

Net Zero Cities. (2023). Sofia 2030 Climate Neutrality Action Plan. Available at: https://netzerocities.app/_content/files/knowledge/4675/ccc_sofia.pdf [Accessed 17 Feb 2026].

Viable Cities. (2023). Stockholm Climate City Contract 2030. Available at: https://viablecities.se/wp-content/uploads/2023/11/Climate_City_Contract_2030_ENG_Stockholm.pdf [Accessed 17 Feb 2026].

Resilient Cities. (2016). Surat Resilience Strategy. Available at: https://resilientcitiesnetwork.org/downloadable_resources/Network/Surat-Resilience-Strategy-English.pdf [Accessed 17 Feb 2026].

Surat Municipal Corporation. (2022). Clean Air Action Plan. Shakti Foundation. Available at: https://shaktifoundation.in/wp-content/uploads/2022/04/Surat-Clean-Air-Action-Plan-.pdf [Accessed 17 Feb 2026].

City of Sydney. (2026) Energy and Climate Change: Adapting for Climate Change Strategy. Available at: https://www.cityofsydney.nsw.gov.au/environmental-action/energy-and-climate-change [Accessed 17 Feb 2026].

Tampere City. (2024). Climate Neutral Tampere 2030. Available at: https://www.tampere.fi/sites/default/files/2024-03/climate_neutral_tampere_roadmap_0.pdf [Accessed 17 Feb 2026].

Tauragė Municipality. (2023). Climate Neutrality Strategy 2030. NetZeroCities. Available at: https://netzerocities.app/_content/files/knowledge/4677/ccc_taurage.pdf [Accessed 17 Feb 2026].

Teresina City (Prefeitura Municipal). (n.d.). CLIMATHE Program: Climate Action. Available at: https://semplan.pmt.pi.gov.br/climathe/ [Accessed 17 Feb 2026].

City of Thessaloniki. (2023). 2030 Climate Neutrality Action Plan. NetZeroCities. Available at: https://netzerocities.app/_content/files/knowledge/4192/thessaloniki_nzc_ccc_ok.pdf [Accessed 17 Feb 2026].

Times of India. (2024). Climate Strategy: Pune Municipal Corporation's Plan to Make Pune Carbon Positive by 2050. Available at: https://timesofindia.indiatimes.com/city/pune/climate-strategy-pune-municipal-corporations-plan-to-make-pune-carbon-positive-by-2050/articleshow/108313537.cms [Accessed 17 Feb 2026].

Toulouse Métropole. (n.d.). Plan Climat. Available at: https://metropole.toulouse.fr/ [Accessed 17 Feb 2026].

Transformative Urban Coalitions. (2021). León, Mexico City Profile No. 2. Available at: https://www.researchgate.net/publication/365534591_TRANSFORMATIVE_URBAN_COALITIONS_LEON_MEXICO_CITY_PROFILES_NO_2 [Accessed 17 Feb 2026].

UNDP Albania. (2026). Adaptation Plan to Climate Changes: Elbasan. Available at: https://www.undp.org/sites/g/files/zskgke326/files/2026-02/3.1.1.2_leaflet_lap_elbasan.pdf [Accessed 17 Feb 2026].

UNEP-WCMC (UN Environment Programme World Conservation Monitoring Centre). (n.d.). Building Cities with Nature: The Story of Chengdu. Available at: https://www.unep-wcmc.org/en/news/building-cities-with-nature--the-story-of-chengdu [Accessed 17 Feb 2026].

UN-Habitat. (n.d.). Exploration and Practice of Urban Regeneration in Wuhan. Available at: https://unhabitat.org/exploration-and-practice-of-urban-regeneration-in-wuhan [Accessed 17 Feb 2026].

Urban Coalitions. (2022). Teresina Urban Lab. Available at: https://urbancoalitions.org/en/urban-labs/teresina [Accessed 17 Feb 2026].

URBAN-LEDS/ICLEI/UN-Habitat/EU. (2021). Leading Climate Action in Cities: How Are Balikpapan and Bogor Doing It? Available at: https://urban-leds.org/wp-content/uploads/2021/08/Final-Urban-LEDS-II-CAPs-Case-Study-for-project-website.pdf [Accessed 17 Feb 2026].

Ajuntament de Valencia. (2022). Valencia 2030 Climate Mission. Available at: https://www.missionsvalencia.eu/wp-content/uploads/2022/05/MisionClimaticaVLC2030_ENG-1.pdf [Accessed 17 Feb 2026].

Vienna City. (2022). Vienna Climate Guide. Available at: https://www.wien.gv.at/english/environment/klip/program.html [Accessed 17 Feb 2026].

World Bank. (n.d.). Making Room for Storm Water: How Floods in Kigali Shed Light on Need for Integrated Urban Planning. Available at: https://blogs.worldbank.org/nasikiliza/making-room-storm-water-how-floods-kigali-shed-light-need-integrated-urban-planning-and [Accessed 17 Feb 2026].

World Cities Culture Forum. (2022). Chengdu Park City Initiative. Available at: https://worldcitiescultureforum.com/city-project/chengdu-park-city/ [Accessed 17 Feb 2026].

World Resources Institute (WRI). (2016). Chengdu Shows How Cities Can Turn Climate Commitments into Action. Available at: https://www.wri.org/insights/chengdu-shows-how-cities-can-turn-climate-commitments-action [Accessed 17 Feb 2026].

World Resources Institute (WRI). (2021). Lessons from Durban's Approach to Water Resilience. Available at: https://www.wri.org/insights/water-resilience-lessons-durban-south-africa [Accessed 17 Feb 2026].

World Resources Institute China (WRI China). (2022). Chengdu Low-Carbon Development Blueprint. Available at: https://wri.org.cn/sites/default/files/2022-01/chengdu-low-carbon-development-blueprint-EN.pdf [Accessed 17 Feb 2026].

World Scientific. (2025). Towards Green and Climate-Resilient Urbanization in Rajshahi City: Urban Growth Meets Climate Action in Northern Bangladesh. Chinese Journal of Urban and Environmental Studies. Available at: https://www.worldscientific.com/doi/full/10.1142/S2345748125500010 [Accessed 17 Feb 2026].

WRI India. (2024). Nashik Launches Its First-Ever Climate Action Plan for Sustainable and Resilient Development. Available at: https://wri-india.org/news/nashik-launches-its-first-ever-climate-action-plan-sustainable-and-resilient-development [Accessed 17 Feb 2026].

Wuhan Development and Reform Commission. (n.d.). Wuhan Development and Reform Commission Portal. Available at: http://xtfgw.xiangtan.gov.cn/ [Original link no longer available as of 17 Feb 2026, accessed via copy].

Xiangtan City. (2020). Low-Carbon City Pilot Implementation Plan 2017-2030. Asian Development Bank. Available at: https://www.adb.org/sites/default/files/project-documents/52230/52230-001-ipsa-en.pdf [Accessed 17 Feb 2026].

Yokohama City. (2025). City Action Plan for Global Warming Countermeasures. Available at: https://www.city.yokohama.lg.jp/lang/overseas/climatechange/contents/zcy/actionplan.html [Accessed 17 Feb 2026].

Net Zero Cities. (2023). Zagreb 2030 Climate Neutrality Action Plan. Available at: https://netzerocities.app/_content/files/knowledge/4893/ccc_zagreb_2.pdf [Accessed 17 Feb 2026].
